# Supplementary material
Source: publisher figshare collection journal article supplement (https://sage.figshare.com/ndownloader/files/10793843)
Supplement: Supplementary file 1 [file 10793843]

**Table S5, Preoperative and postoperative of mean coordinate of control group’s facial landmarks**

|  | **Coordinate(mm)** | | | | | |
| --- | --- | --- | --- | --- | --- | --- |
| **Pre-operative(n=60)** | | | **Post-operative(n=60)** | | |
| **Landmarks** | **x** | **y** | **z** | **x** | **y** | **z** |
| **G** | 0.0000 | -14.90 | 2.6744 | 0.0000 | -13.8781 | 2.3892 |
| **S** | 0.0000 | 0.0000 | 0.0000 | 0.0000 | 0.0000 | 0.0000 |
| **(N)Mf** | -10.3705 | 3.7471 | 2.7075 | -10.4274 | 4.9028 | 2.8966 |
| **(C)Mf** | 9.5545 | 3.8951 | 3.7660 | 10.0022 | 4.8455 | 3.7563 |
| **(N)En** | -16.9259 | 5.6894 | 4.9498 | -16.6753 | 6.3269 | 4.3865 |
| **(C)En** | 17.3726 | 6.2186 | 6.1589 | 17.1648 | 6.6423 | 5.6771 |
| **Prn** | -2.9818 | 25.7618 | -27.2254 | -1.9852 | 26.2712 | -28.9808 |
| **(N)G-up** | -15.1312 | 25.2933 | -12.1456 | -14.8225 | 25.2164 | -12.0789 |
| **(N)G-lat** | -19.9422 | 37.9825 | -10.2158 | -19.4847 | 38.8439 | -11.7204 |
| **(N)G-base** | -16.6198 | 36.2216 | -19.6165 | -13.2932 | 36.1681 | -20.4890 |
| **(N)G-ant** | -11.3651 | 27.7952 | -23.2995 | -10.6862 | 27.1279 | -24.2078 |
| **(C)G-up** | 13.1407 | 25.7615 | -11.3536 | 13.5334 | 25.8467 | -12.2535 |
| **(C)G-lat** | 19.7646 | 36.7854 | -9.3535 | 20.3058 | 36.6975 | -10.7129 |
| **(C)G-base** | 15.5794 | 37.0027 | -17.8563 | 16.0751 | 36.3752 | -19.2048 |
| **(C)G-ant** | 9.8190 | 29.0433 | -22.6254 | 10.5858 | 28.8216 | -23.9183 |
| **NC-up** | -2.3684 | 36.8794 | -26.1070 | -1.3494 | 35.0979 | -28.2401 |
| **Sn** | -0.6258 | 43.1598 | -19.9428 | -0.2536 | 42.7073 | -21.1474 |
| **(N)N-up** | -7.1504 | 33.9659 | -25.0317 | -6.2144 | 33.1678 | -26.4230 |
| **(N)N-lat** | -13.7349 | 36.8077 | -20.5505 | -12.6718 | 35.7480 | -22.1673 |
| **(N)N-base** | -9.4842 | 39.9930 | -16.8475 | -9.7189 | 39.9930 | -17.6712 |
| **(N)N-inter** | -3.7763 | 38.0832 | -21.6996 | -3.4759 | 37.6832 | -23.0211 |
| **(C)N-up** | 6.9926 | 36.8736 | -23.2699 | 6.8162 | 35.4639 | -26.1167 |
| **(C)N-lat** | 12.8951 | 38.6052 | -17.6010 | 12.6788 | 37.2995 | -19.6517 |
| **(C)N-base** | 8.8143 | 42.0393 | -15.2771 | 9.4206 | 42.5641 | -17.0221 |
| **(C)N-inter** | 3.0524 | 40.2071 | -21.4705 | 3.0638 | 39.4811 | -23.0040 |
| **Ls** | 1.7695 | 50.8726 | -27.0549 | 2.1026 | 50.9571 | -28.7059 |
